# Supplementary material for: Biallelic mutations in MOS cause female infertility characterized by human early embryonic arrest and fragmentation
Source: PubMed Central journal article supplement (PMC8649871; doi:10.15252/emmm.202114887), 2021-11-15
Supplement: EMMM-13-e14887-s010.pdf [file EMMM-13-e14887-s010.pdf]

## Expanded View Figures

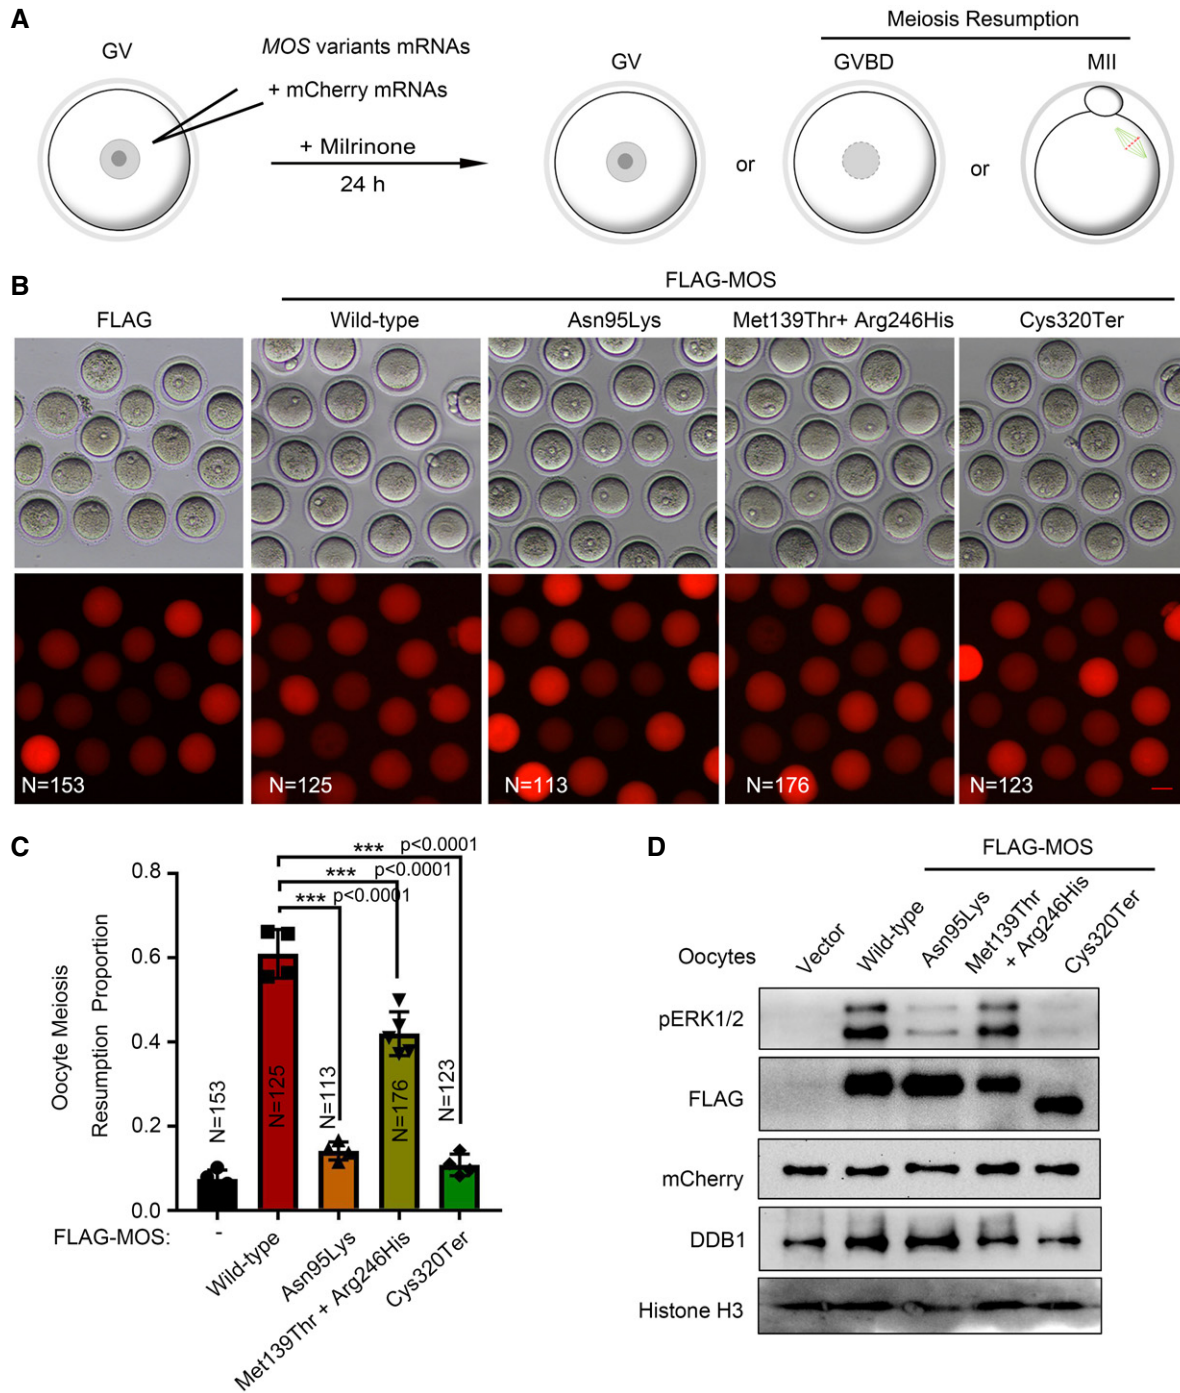

Figure EV1.

**Figure EV1. The effect of MOS variants on promoting oocyte meiosis maturation.**

- A The diagram showing the experimental procedure. Germinal vesical (GV) oocytes were microinjected with FLAG-tagged *MOS*, *MOS*<sup>Asn95Lys</sup>, *MOS*<sup>Met139Thr</sup> and *MOS*<sup>Arg246His</sup>, *MOS*<sup>Cys320Ter</sup>, or FLAG mRNAs combined with mCherry mRNAs, and maintained in milrinone-treated M2 medium for 24 h. The number of GV oocytes, germinal vesical breakdown (GVBD), or metaphase II (MII) oocytes was counted.
- B The representative bright-field images and fluorescent images were captured at 24 h after microinjection using a Nikon microscope. Over 100 oocytes in each group. Scale bar = 100 μm.
- C The percentage of meiosis resumption (GVBD and MII) oocytes at 24 h after microinjection with different *MOS* mRNAs in (B). N number was labeled in each graph.
- D Western blot analysis of FLAG, pERK1/2, and mCherry using oocytes after microinjection with different *MOS* mRNAs combined with mCherry mRNAs for 24 h. Histone H3 and DDB1 were used as loading controls. *N* = 100 oocytes per sample.

Data information: For C, data are expressed as mean ± SD. One-way ANOVA followed by *post hoc* Tukey's test for multiple comparisons, \*\*\**P* < 0.0001. Source data are available online for this figure.

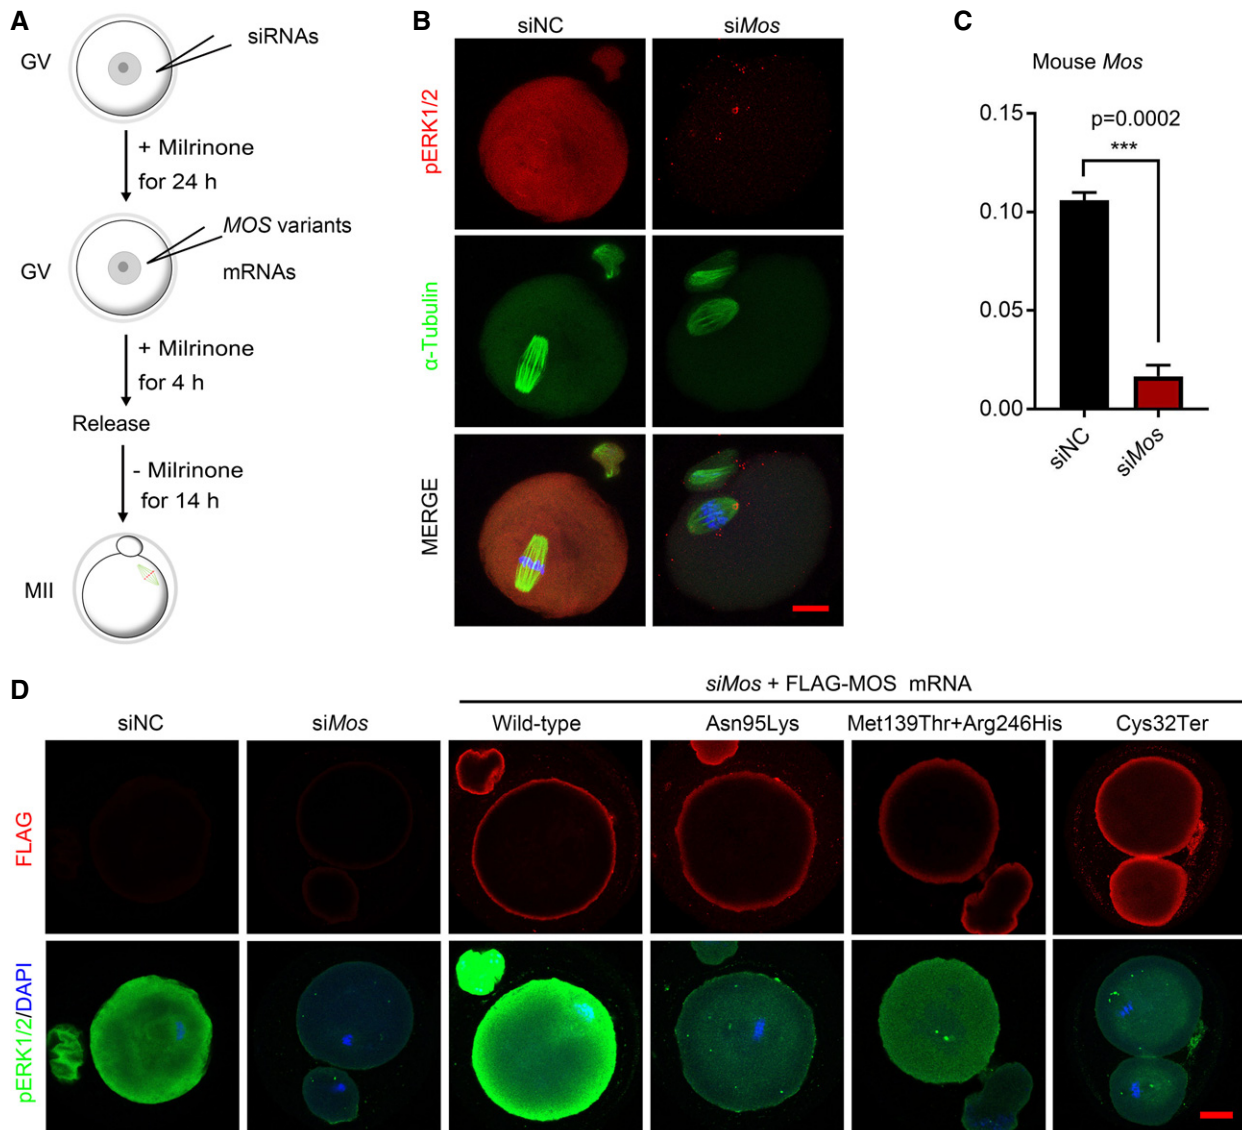

Figure EV2.

**Figure EV2. The RNAi effect of *Mos* and the rescuing effects of different *MOS* variants in oocytes.**

- A Schematic diagram of oocyte cultures and experimental procedure. Mouse GV oocytes were microinjected with siRNAs and cultured for 24 h in the presence of 2.5  $\mu$ M milrinone, followed by microinjection of *MOS* variants mRNAs, and cultured for 4 h before release to fresh M2 medium for another 14 h culture. Then, the RNAi efficiency of siRNA targeting mouse *Mos* and rescuing effects of different human *MOS* variants were determined.
- B The representative images showing the decreased pERK1/2 (red) and abnormal spindle (FITC- $\alpha$ -tubulin, green) after *Mos* siRNA injection. DAPI (blue) was stained for visualization of DNA. Scale bar = 10  $\mu$ m.
- C RT-qPCR results showing the mouse *Mos* mRNA expression levels in oocytes with negative control siRNAs or *Mos* siRNAs ( $n = 3$ ).
- D Representative immunofluorescence images showing the FLAG (red) and pERK1/2 (green) levels in mature oocytes after microinjection of si*Mos* or combined with indicated human *MOS* variants in GV oocytes. At least 30 oocytes each group were used for immunofluorescence. Scale bar = 10  $\mu$ m.

Data information: In C, data are expressed as mean  $\pm$  SD of three biological replicates. \*\*\* $P = 0.0002$  (unpaired two-tailed Student's  $t$ -test).

Source data are available online for this figure.
